# UV light dosage distribution over irregular respirator surfaces. Methods and implications for safety.

*Aurora Baluja(a), Justo Arines(b), Ramón Vilanova(c), Carmen Bao(b), Maite Flores(b)*

## **Institutions:**

- a) Department of Anaesthesiology and Critical Care. Hospital Clínico Universitario. FIDIS Health Research Institute. Santiago de Compostela, Spain;
- b) Photonics4Life research group, Optics Area, Department of Applied Physics, Universidade de Santiago de Compostela, 15782, Spain;
- c) Iberman Group. University Hospital. Santiago de Compostela. Spain.

**Disclosures:** Authors declare that there are not conflicts of interest related to the results of this article.

**Funding:** This work was partially supported by the Consellería de Educación Program for Development of a Strategic Grouping in Materials – AeMAT Grant No. ED431E2018/08 and Xunta de Galicia ref. ED431B2017/64.

**Correspondence:** Aurora Baluja. Department of Anesthesiology, Intensive Care and Pain Management, Complejo Hospitalario Universitario. Santiago de Compostela. Instituto de Investigación Sanitaria (IDIS). Travesía da Choupana s/n, Santiago de Compostela, 15706 A Coruña, Spain. E-mail address: maria.aurora.baluja.gonzalez@sergas.es. Tel: +34 981 950 674. Fax: +34 981 950 634.

**Keywords:** Respirator; coronavirus, ultraviolet, dosimetry, irradiance.

## **ABSTRACT**

### **Background and Objectives:**

The SARS-CoV2 pandemic has led to a global decrease in protection ware, especially facepiece filtering respirators (FFRs). Ultraviolet-C wavelength is a promising way of decontamination, however adequate dosimetry is needed to ensure balance between over and underexposed areas and provide reliable results. Our study demonstrates that UVGI light dosage varies significantly on different respirator angles, and propose a method to decontaminate several masks at once ensuring appropriate dosage in shaded zones.

### **Methods:**

An UVGI irradiator was built with internal dimensions of 69.5 x 55 x 33 cm with three 15W UV lamps. Inside, a grating of 58 x 41 x 15 cm was placed to hold the masks. Two different respirator models were used to assess irradiance, four of model Aura 9322 3M of dimensions 17 x 9 x 4cm, and two of model SAFE 231FFP3NR with dimensions 17 x 6 x 5 cm. A spectrometer STN-SilverNova was employed to verify wavelength spectrum and surface irradiance. A simulation was performed to find the irradiance pattern inside the box and the six masks placed inside. These simulations were carried out using the software DIALUX EVO 8.2.

### **Results:**

The data obtained reveal that the dosage received inside the manufactured UVGI-irradiator depends not only on the distance between the luminaires plane and the base of the respirators but also on the orientation and shape of the masks. This point becomes relevant in order to assure that all the respirators inside the chamber receive the correct dosage.

### **Conclusion:**

Irradiance over FFR surfaces depend on several factors such as distance, angle of incidence of the light source. Careful dosage measurement and simulation can ensure reliable dosage in the whole mask surface, balancing overexposure. Closed box systems might provide a more reliable, reproducible UVGI dosage than open settings.

**Abbreviations:**

CDC: Centers for Disease Control and Prevention.

CoV2: novel coronavirus 2.

FFR: facepiece filtering respirator.

NIOSH: National Institute for Occupational Safety and Health.

SARS: severe acute respiratory syndrome.

UV-C: ultraviolet C.

UVGI: ultraviolet germicidal irradiation.

## INTRODUCTION

The SARS-CoV2 pandemic has led to a global, critical decrease in protection ware, especially facepiece filtering respirators (FFRs). Due to this shortage, multiple recommendations have arisen, in particular related to the use of ultraviolet germicidal irradiation (UVGI, 254 nm) for decontamination [1–3]. As of 30/03/2020 CDC issued new guidelines to reuse masks [4] acknowledging that decontaminated N95 mask limited reuse may be necessary in dire shortage situations.

UVGI acts primarily over surfaces. Thus, surface shape, incidence angle and distance related to the light source are key factors for local irradiance. The resulting UV dose (fluence) is therefore the product of the irradiance by exposure time. Given the high spread potential and severity of SARS-CoV2, local overdose may be sacrificed in order to minimise contamination risk by underexposure, as most FFRs can tolerate higher than germicidal doses. However, protocols for mask descontamination inside rooms with powerful UV-C sources might not ensure an even dosage distribution among masks placed at different angles from the lamp.

The main objective of this study is to demonstrate that UVGI light dosage varies significantly on different respirator angles, and propose a method to descontaminate several masks at once ensuring appropriate dosage in shaded zones.

## METHODS

### *UVGI device*

An UVGI box irradiator was built with internal dimensions of 69.5 cm length, 55 cm wide, 33 cm tall. Inside, a grating of 58x41x15 cm was placed in order to hold the masks. Three 15W lights HNS 15W G13 (OSRAM) were located at the upper limit in three of the four walls of the box. The plane containing the three luminaires is parallel to the bottom. The grating that will hold the respirators is placed over the bottom. The length between the luminaires plane and the grating was evaluated and measurements were taken to find the more homogeneous dosage inside the UVGI chamber. The whole internal surface of the chamber was coated with a matte aluminum insulating lining. Aluminum is known to present a good reflection in the UV-C wavelength range [5, 6].

### *Calibration spectrometer*

A spectrometer STN-SilverNova, with a sensitivity range between 190nm and 1110 nm (2nm resolution) equipped with a STN-CR2-cosine corrector was used to verify the 254nm emission spectrum. The spectrometer was calibrated with the STN-IRRADUVN-CAL to measure the dosage received inside the chamber and evaluate the several critical positions.



## RESULTS

The irradiance distribution of the luminaire (see Figure 1) was measured, showing its peak at the 254nm with a Full Width Half Maximum (FWHM) of 4.84 nm. A lamp heating time around 5 min was observed in order to obtain a stable emission.

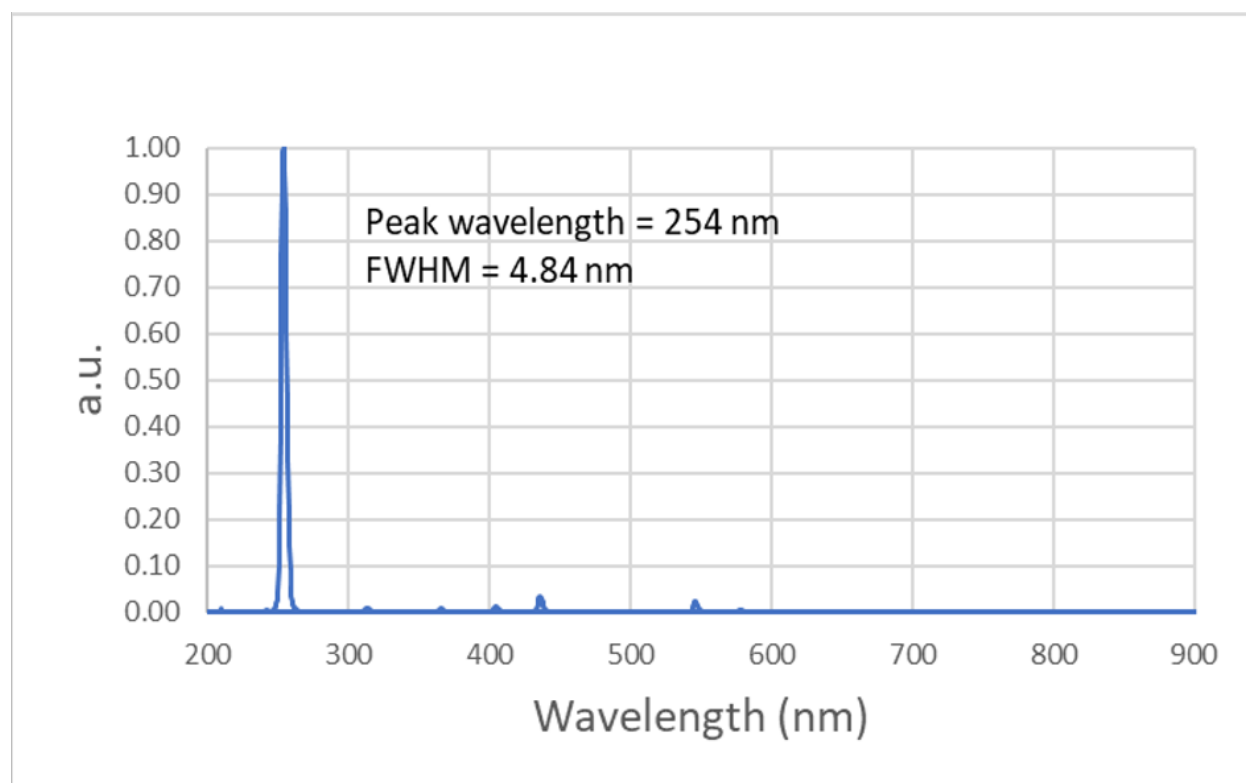

Figure 1: Spectrum of emission of the HNS 15 W G13 OSRAM luminaire.

In order to evaluate the optimal orientation of the respirators inside the chamber, several dosage measurements were done. The first measurements were obtained with the grating located at a vertical distance of 10 cm from the luminaires plane and with a single respirator inside the chamber located near the wall without luminaires. The detector was placed just at the right of the respirator at the first measure (see figure 2a). A dosage of  $550 \mu\text{W}/\text{cm}^2$  was obtained. The measure was repeated moving the respirator 5 cm towards the opposite wall that counts with a luminaire (see figure 2b). In this case a dosage of  $700 \mu\text{W}/\text{cm}^2$  was measured.

The same measurements were repeated with a distance between the grating and the luminaires planes of 16 cm. In this case values of  $650 \mu\text{W}/\text{cm}^2$  and  $780 \mu\text{W}/\text{cm}^2$  were obtained at positions A and B, respectively. That indicates that a 16cm distance assures higher dosages than at 10 cm distance, thus this height was selected for performing the following measurements. In addition, the detector was placed pointing upwards inside the masks, to measure the dosage received by the inner part of the respirator. With this setup a dosage of  $60 \mu\text{W}/\text{cm}^2$  was obtained. (see Figure3a)

To evaluate if there is difference in the dosage received by the respirators, when they are placed in different positions inside the chamber, as well as to evaluate the shadows in terms of dosage when several respirators are disinfected at the same time, the following measurements were performed. Two different respirator

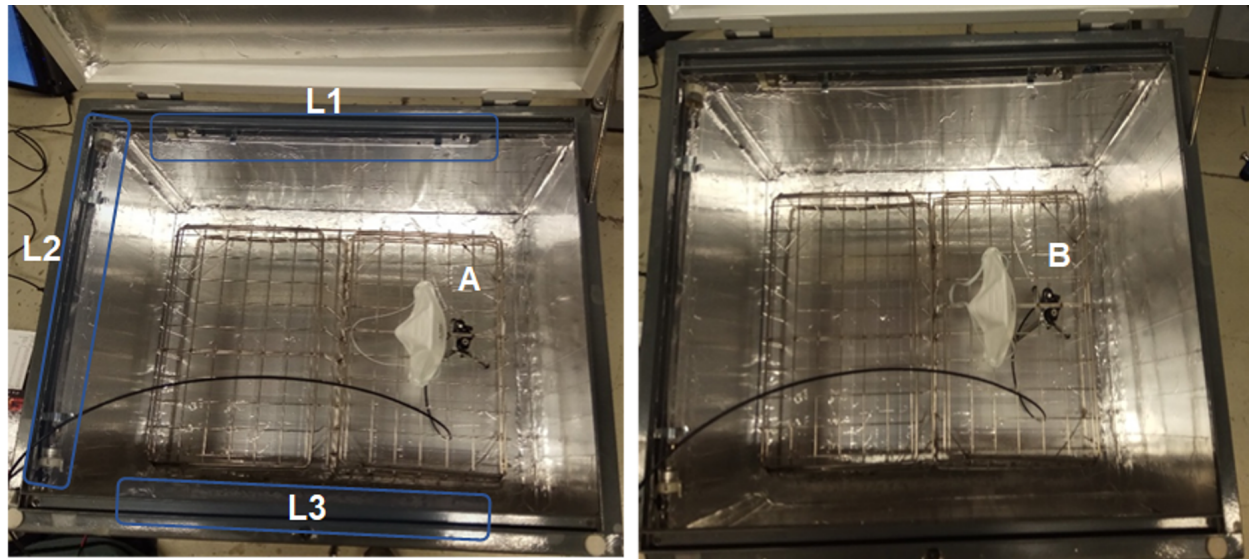

Figure 2: Photography of the inner part of the chamber, with the lamps L1 L2 and L3; the grating located at 10cm from the lamps plane; Position A, just beside the respirator; Position B, with the respirator placed 5 cm towards the left side.

models were used, four of model Aura 9322 3M of dimensions 17 cm x 9 cm x 4cm, and two of model SAFE 231FFP3NR with dimensions 17 cm x 6 cm x 5 cm. Both masks have different sizes and heights upon the grating. The first measurement was done in position C shown in Figure 3b, that correspond to the position closer to the wall without lamp. At this position, the dosage detected was  $470 \mu\text{W}/\text{cm}^2$ , while at positions D and E the values obtained were  $950 \mu\text{W}/\text{cm}^2$  and  $1300 \mu\text{W}/\text{cm}^2$ , respectively.

In the second configuration, the position of the higher respirators was changed by moving them close to lamp L2. In this configuration, shown in figure 3c, the dosage achieved at the position marked by letter F was  $1050 \mu\text{W}/\text{cm}^2$ . To test if the dosage depends on the position of the respirators over the grid, they were rotated 90 degrees and the sensor probe was bent at a 30 degree with the horizontal in order to evaluate the dosage at the lateral of the respirators. This configuration is shown in figure 3d. In this case the result obtained at the point marked by a G was  $878 \mu\text{W}/\text{cm}^2$ . Note that the sensor was located slightly below the plane of the masks so, a higher dosage value is expected in upper positions.

Finally, the sensor was placed under the respirators pointing downwards in order to determine the light coming from reflections at the bottom of the chamber at two different position marked by an H and a I in figures 3 e and 3 f, respectively. The results at both positions were  $422 \mu\text{W}/\text{cm}^2$  and  $410 \mu\text{W}/\text{cm}^2$ ; respectively, indicating that the light distribution generated by reflections in the matte aluminum coating of the box is very homogeneous.

### Data Analysis

The data obtained reveal that the dosage received inside the manufactured UVGI-irradiator depends not only on the distance between the luminaires plane and the base of the respirators but also, on the orientation and shape of the masks. This point becomes relevant in order to assure that all the respirators inside the chamber receive the correct dosage. Although could be expected that the nearer the respirator is to the luminaires, the higher dose it receives, the experiment reflects this assumption is not true. For example in the presented work,  $100 \mu\text{W}/\text{cm}^2$  more irradiance was obtained when placing the base of the masks at 16cm than when they were placed them at 10cm from the plane that contains the lamps.

By the analysis of the data, the absorption produced in a respirator can be determined, by measuring the dosage received just under one of them. The data confirms that around one order of magnitude of the dosage

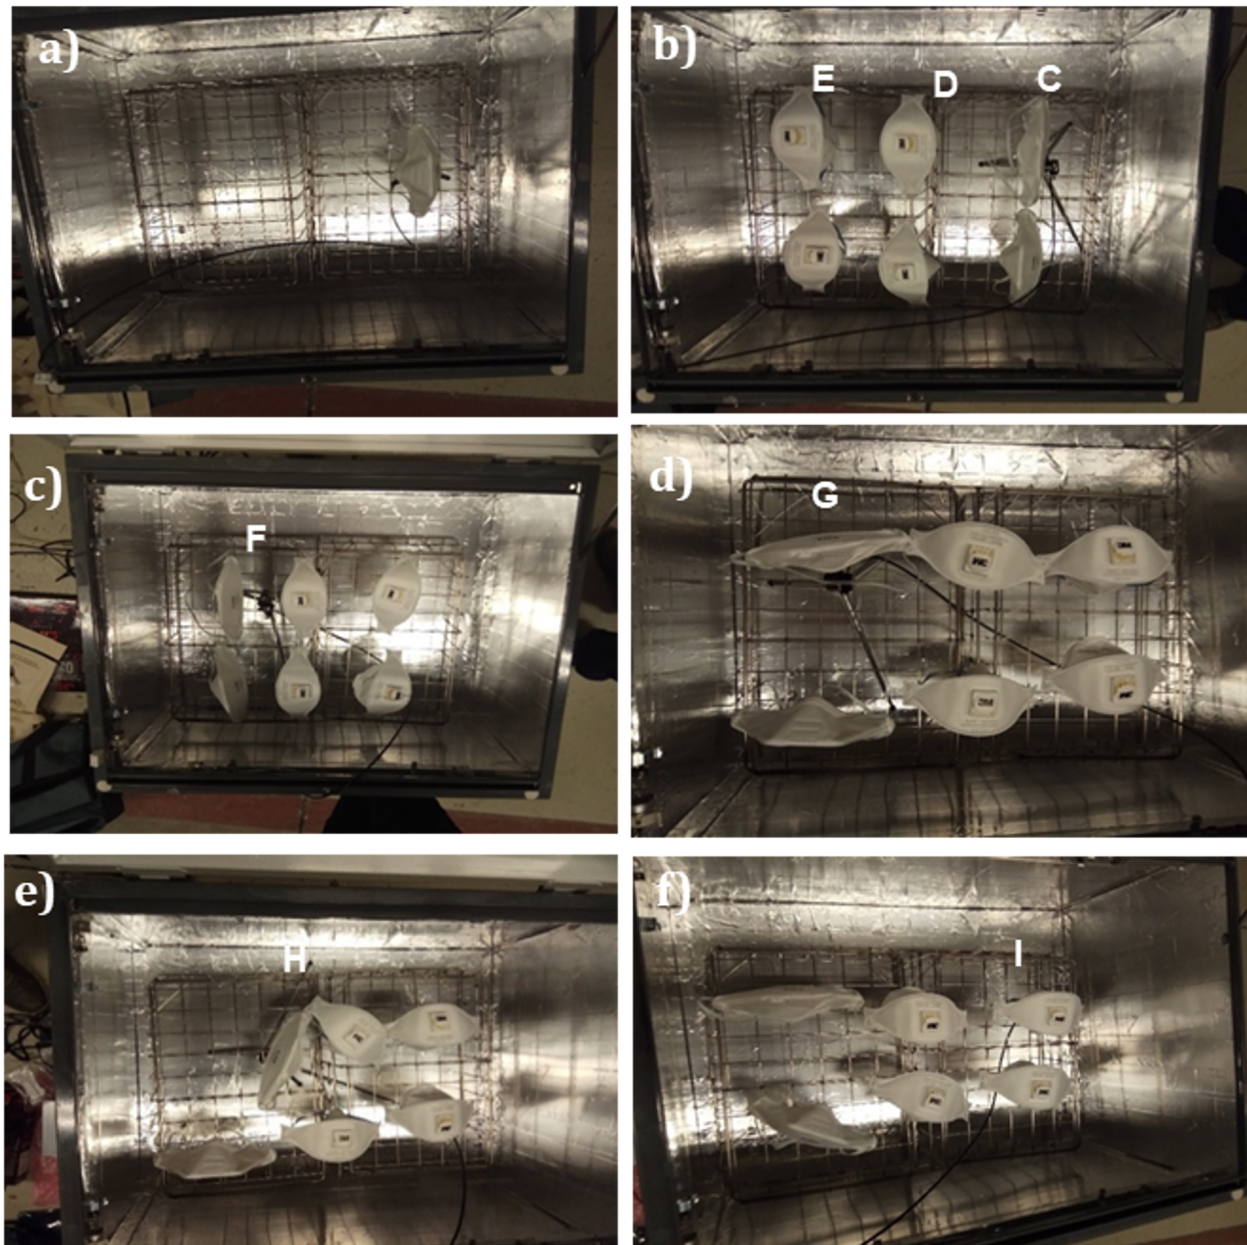

Figure 3: Photography of the inner part of the chamber, with the grating located at 16 cm from the luminaires plane a) detector just below the respirator, and 6 respirators placed in different configurations b) masks placed vertically with the shorter masks closer to the left lamp c) masks placed vertically with the taller masks closer to the left lamp d) masks placed horizontally, e) detector placed below one of the tall masks near the middle of the box; and f) detector placed below one of the short masks near the right side of the box, far from the lamp on the left side of the box.



is absorbed by the bulk of the respirator. That should be taken into account, in case that the geometry of the respirator doesn't allow to turn them for receiving a certain dose for sterilization. In this case, the exposure time should be calculated in order to warrant the dosage in the inner part of the FFRs.

### ***Irradiance Simulation***

Some simulations were also made in order to find the shadows and areas with less irradiance inside the box. These simulations were carried out using the software DIALUX EVO 8.2.

Two masks models were simulated: model SAFE 231FFP3NR and the model Aura 9322 3M. The first model was simulated with a truncated pyramid of dimensions (long, width, high) 17cm x 4cm x 9cm. The base of 4 cm corresponds to the case where the masks are slightly open. The second model was simulated with a truncated pyramid of dimensions 17cm x 9cm x 5cm. The masks were placed in two rows and three columns as they are planned to be in the disinfection box. Additionally, two different orientations were simulated with respect to the long side of the box, parallel and perpendicular.

Figure 4 shows on the left column the experimental setup with the irradiance measured at different positions, and mask distribution. On the right column the results of the simulation are shown. The pictures present a pseudocolor map of the distribution of light inside the UVGI irradiator at the planes of the respiratory masks. Blue colors correspond to a reference amount of light. Green color represents a value equal to two times the reference value, yellow corresponds to three times, amber to four times, and red to 5 times. Similarity was observed between the measured data and the simulations. In both cases, as long as we move away from L2, a reduction in the irradiance is calculated, getting the minimum exposure in the right side of the respirator mask on the right. Both, measured data and simulations reflect that in region C of figure 4 we get half of the exposure obtained at D, and one third of that at E. Additionally, comparing the two light distribution obtained for the two orientations of the respiratory masks, the shadows obtained with the masks parallel to the long side of the box, are less pronounced. Hence, this orientation is suggested as the preferred one.

Figure 5 compares the pseudocolor maps of the light distribution inside the disinfection box using three and four lamps. Note the difference between using three or four lamps, as four lamps provide a more uniform light distribution with less difference in the light amount. With four lamps we also diminish the shadows in the face of the mask of the right side.

### ***Dosage-time relationship***

The resulting UV dose (fluence) is the product of the irradiance by exposure time, as follows:

$$(1) \text{ UVdose}(J/cm^2) = \text{Irradiance}(W/cm^2) * \text{Time}(s)$$

Therefore, in order to know the exposure time needed for sterilization of the respirators used with COVID patients, the following relation is used:

$$(2) t = \frac{\text{dosage}}{\text{irradiance}}$$

being **t**, the exposure time expressed in seconds, **dosage** expressed in J/cm<sup>2</sup> and the **irradiance** in W/cm<sup>2</sup>.

Calculations were made for the time needed to receive a certain dosage in the less irradiated position. As an example, exposure times for different dosages are presented at Table 1. This was carried out to ensure that the cumulative dosage received by all and each respirator is enough to work in safety conditions when these are reused after being in contact with COVID patients.

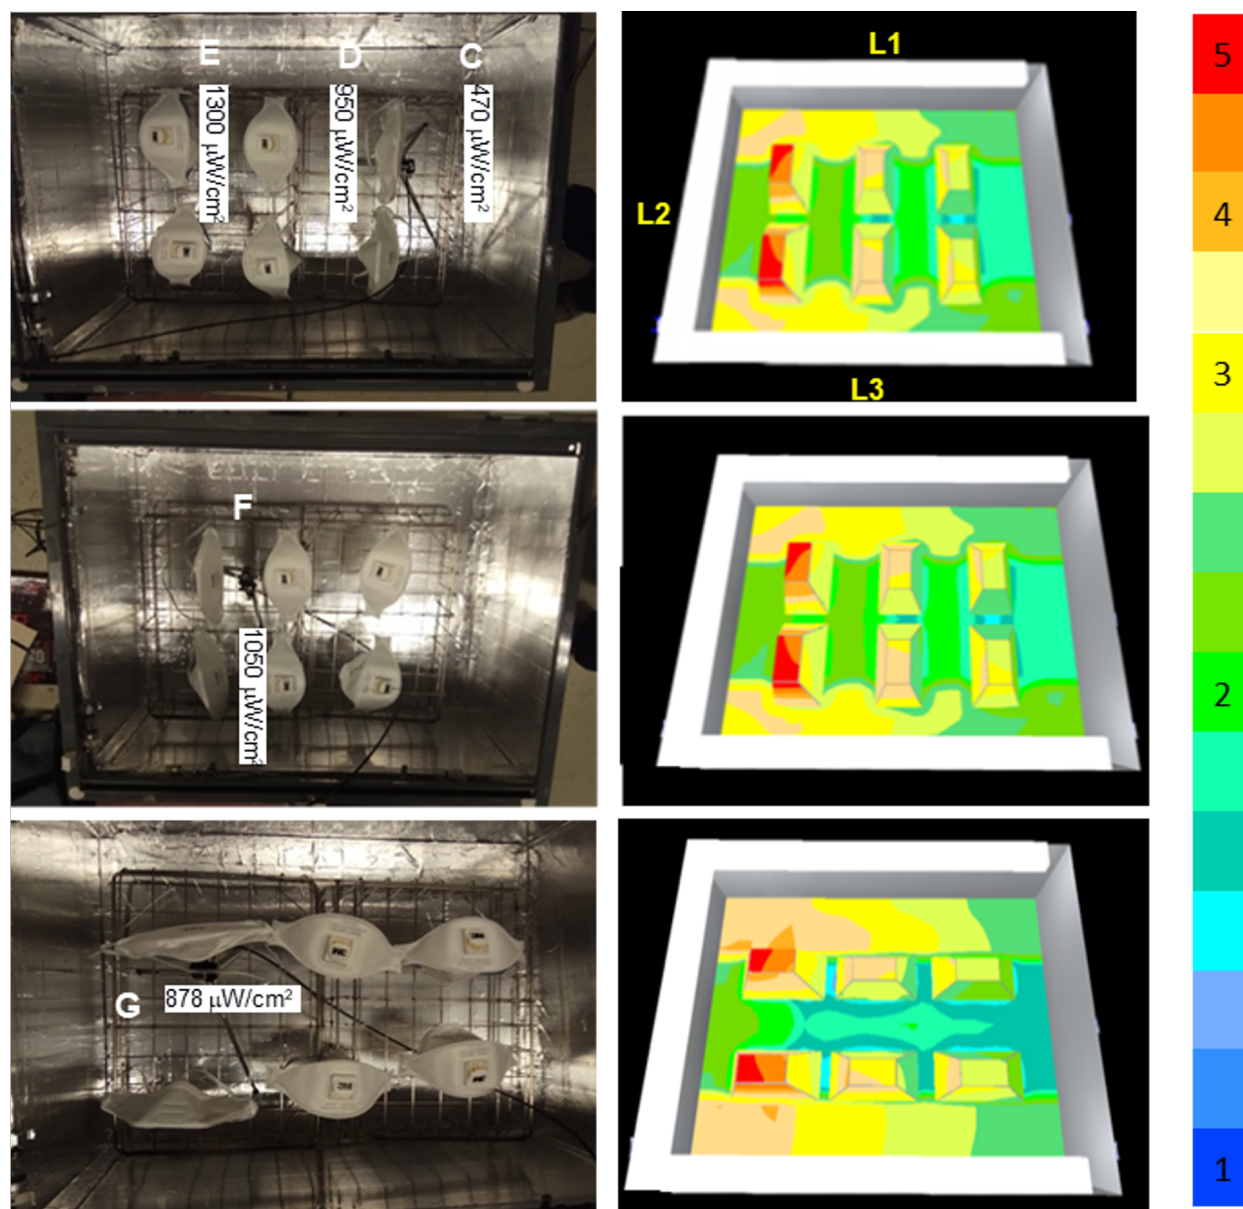

Figure 4: left) Representation of the experimental data obtained in the disinfection box; Right) simulated light distribution maps in pseudocolor maps inside the UVGI irradiator. The luminaires are marked in white and named L1, L2 and L3. Blue colors correspond to a reference amount of light. Green color represents a value equal to two times the reference value, yellow corresponds to three times, amber to four times, and red to 5 times.

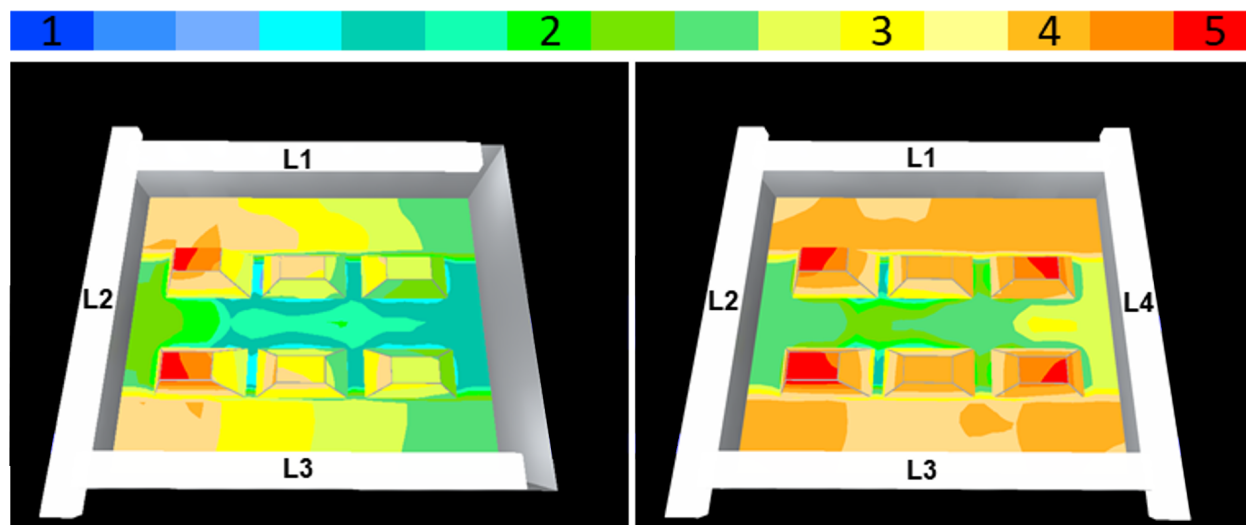

Figure 5: Pseudocolor map of light distribution obtained with three and four lamps for two models of facial respiratory masks, oriented parallel to the long side of the box.

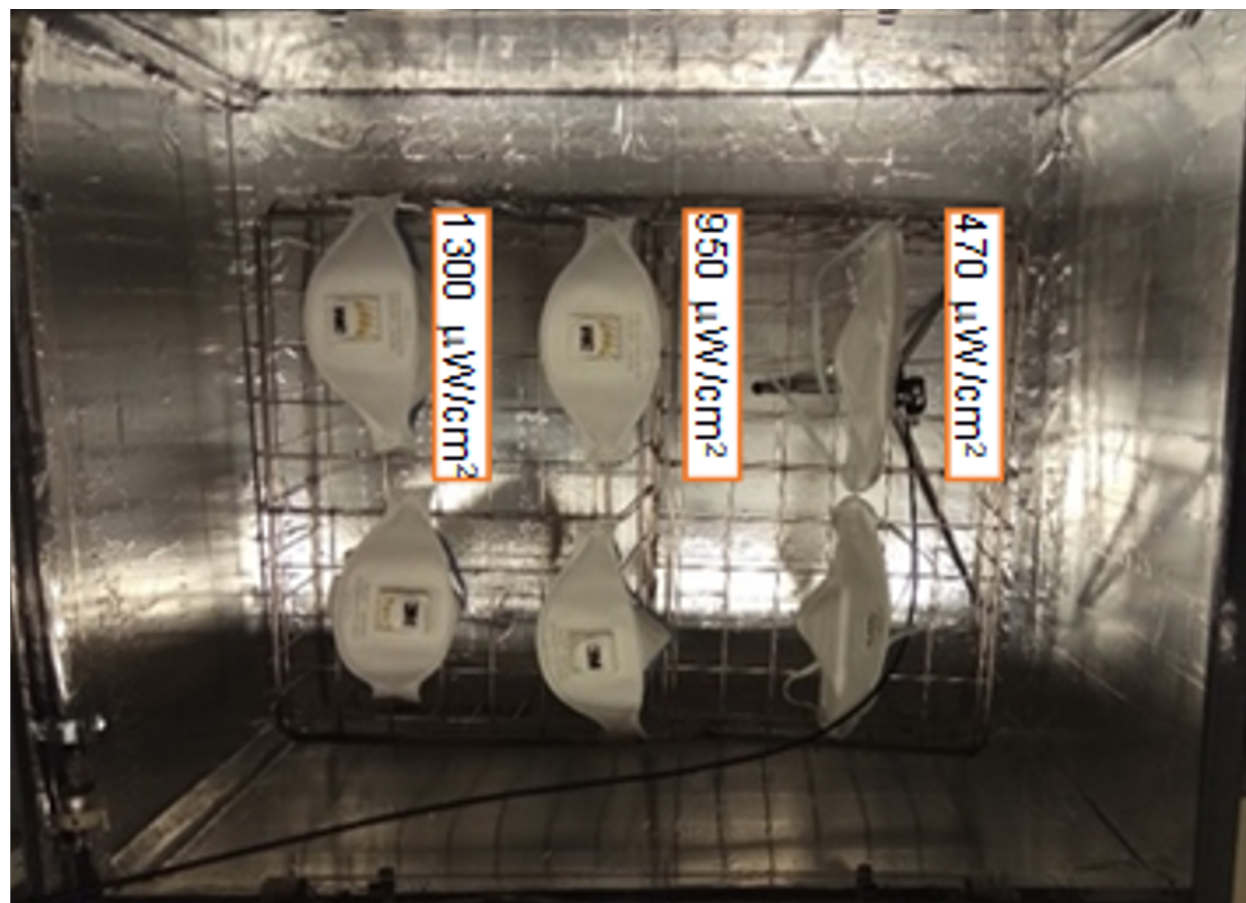

Figure 6: Photography of the opened UVGI irradiator with the respirator placed in the configuration of Figure 3c, indicating the irradiance received at three different positions.

### ***Real setting application***

The irradiator, equipped with four wheels, was placed in the COVID ICU of a tertiary-care hospital (16 beds) in a separate room more than 2m away from any COVID patient. The placement was inside the COVID area to avoid contamination elsewhere. The box was equipped with an on-off switch and a security mechanism that turned the lamps on when closed and off upon lid opening. After building another irradiator unit, the capacity doubled to  $93 \times 2 = 186$  units/day. Precise instructions were given for their use, indicating the target time of decontamination (1.5 hours). Users were instructed to write down their name in the FFRs and mark them each time they underwent decontamination. The masks waiting to be decontaminated were placed inside individual, named envelopes. The FFRs were then placed one by one as described in **Fig 3b** avoiding contact with the surface in contact with the wearer. After irradiation, masks were placed again in clean, individual envelopes. To ensure grid decontamination after each cycle, an additional time of 5 min was added with the cabinet closed and no masks inside.

An additional set of instructions were given in order to promote a rational use of the irradiator, as neither NIOSH nor 3M nor the Spanish Health Ministry recommend FFR reuse except in extreme shortages when no new masks are available. Based on recommendations given by those sources and our own user experience we discourage using the irradiator when *any* of the following conditions are met:

1. The specified time of usage has been completed for one particular mask (eg 8h total use for N95 masks).  
Or 5 uses on different occasions.
2. FFR which completed 3 UV-C cycles (equivalent to 9 Joules / cm<sup>2</sup> in total).
3. Used during aerosol-generating procedures (such as oral hygiene or airway procedures).
4. Contamination by patient fluids.
5. Wet mask (sweat, etc).
6. Any of the 3 known complications UV-C disinfection in FFRs:
  - 6a- Loss of fit or adjustment.
  - 6b- Moderate or intense odor that doesn't disappear after 10 minutes of aeration.
  - 6c- Elastic bands deterioration, (if there aren't any other complications, it can be saved with the placement / stapling of new elastic tapes).
7. Also, discard when:
  - 7a- Doubts about adequate decontamination in a suitable time.
  - 7b- Visible damage to the mask or increased difficulty in breathing through the filter.
8. If it must be removed prematurely from the irradiator, treat it as a non-decontaminated FFR.



## DISCUSSION

This study demonstrates the extent of the dependence between dosimetry and mask location, relative to the light cone and other masks or obstacles that might be present. With regard to room UVC decontamination of FFRs, dosage needs to be measured at the most extreme incidence angles. On the other side, small UVGI cabinets have less angle variability but they often need flipping the object to be decontaminated, and some respirator brands have conic-oval volumes that can't stand stable in both flipped positions. A big-furnace method is proposed which allows for multiple mask decontamination without the need to leave COVID-areas and doesn't require to flip the respirator for the desired dosage, thus ensuring minimal respirator manipulation.

Ultraviolet light is gaining acceptance among the healthcare community as they're a cost-effective alternative to heat or chemical descontamination. At moderate UVGI doses, mask performance still surpasses that of surgical masks, thus being a viable alternative when no new FFRs are available. Viscusi et al administered 3.24 J/cm<sup>2</sup> and examined fit, odor, comfort and deterioration in several mask brands, not finding significant differences using UVGI [2]. NIOSH collaborators, Lindsley et al [3] found changes in particle penetration, but only small changes in resistance after very high UVGI doses (up to 950 J/cm<sup>2</sup>).

Regarding disinfection, NIOSH guidelines [3] advise to discard masks after aerosol-generating procedures. However, previous studies have shown that UV disinfection is suitable to remove viral load although more studies are needed to ascertain viral removal from the inner FFR layers. UVGI dose for coronavirus in surfaces has been shown to be lower than other types as they're single-stranded RNA virus. For example, Duan et al [7] found that 0.32 J/cm<sup>2</sup> can inactivate SARS-CoV in culture plates, whereas for H1N1 influenza, decontamination with 1.2, 1.8 or 1.98 Joules/cm<sup>2</sup> achieved an average 4-log reduction of viable H1N1 influenza virus [1, 8, 9].

### *Limitations*

This is a study where changes in irradiance are studied in a closed, controlled environment. Different mask brands have different shapes, modifying local irradiance. To compensate for this, overdosing of more exposed areas might be necessary, causing them to accumulate more deterioration, shortening the respirator's life. Further studies might be needed to ascertain dose homogeneity when the UVGI lamps are placed in a bigger compartment, such as a room. In addition, adding light sources on both sides of the rack might provide more reliable illumination avoiding over and underexposure. This UVGI box currently doesn't support the descontamination of more than six masks at once. Bigger designs can provide mask reuse at a bigger scale in times of severe shortages. Currently, virological assessment is being designed in an appropriate setting for this irradiator. Thus, target dosage regimes are based on previously published experiments elsewhere.



## CONCLUSION

Irradiance over FFR surfaces depend on several factors such as distance, angle of incidence of the light source. Careful dosage measurement and simulation can ensure reliable dosage in the whole mask surface, balancing overexposure. Closed box systems might provide a more reliable, reproducible UVGI dosage than open settings.

## RECOMMENDATIONS

- Custom UVGI devices must feature mechanisms to protect from harmful UVGI irradiation.
- Dosimetry from strategic locations of an UVGI facility allows for correct time-irradiance calculations in respirators at different positions.
- Irradiance measurements can be performed by experts in visible light pollution or photonics, given access to a UV-C light spectrometer.
- Alternatively, manual dosimeter probes can be used at such locations.
- Careful respirator placement must be ensured to minimise error in the administered UV dose.
- Clear instructions on device operation and respirator reuse must be issued, updated and published in the work environment.

**Acknowledgements:** We would like to acknowledge the help and support received by the Physics and Optics faculties, Ricardo Rodríguez and Julio Cortiñas from the Department of Anaesthesiology. We would also like to thank Professor Salvador Bará Viñas of the Photonics4Life group at USC for his advice in carrying out measurements and checking calculations.

## TABLES

Table 1. Exposure time with the respirators in the configuration of **Fig 3d**.

| <b>Dosage</b> | <b>5mJ/cm<sup>2</sup></b> | <b>300mJ/cm<sup>2</sup></b> | <b>1J/cm<sup>2</sup></b> | <b>3J/ cm<sup>2</sup></b> |
|---------------|---------------------------|-----------------------------|--------------------------|---------------------------|
| Exposure time | 11 s                      | 12 min                      | 36 min                   | 1 h 40 min                |

---

## REFERENCES

1. Heimbuch BK, Wallace WH, Kinney K, Lumley AE, Wu C-Y, Woo M-H, et al. A pandemic influenza preparedness study: Use of energetic methods to decontaminate filtering facepiece respirators contaminated with H1N1 aerosols and droplets. *American Journal of Infection Control*. 2011;39:e1–9.
2. Viscusi DJ, Bergman MS, Novak DA, Faulkner KA, Palmiero A, Powell J, et al. Impact of three biological decontamination methods on filtering facepiece respirator fit, odor, comfort, and donning ease. *Journal of Occupational and Environmental Hygiene*. 2011;8:426–36.
3. Lindsley WG, Jr SBM, Thewlis RE, Sarkisian K, Nwoko JO, Mead KR, et al. Effects of Ultraviolet Germicidal Irradiation (UVGI) on N95 Respirator Filtration Performance and Structural Integrity. *Journal of Occupational and Environmental Hygiene*. 2015;12:509–17. doi:10.1080/15459624.2015.1018518.
4. CDC. Coronavirus Disease 2019 (COVID-19). Centers for Disease Control and Prevention. 2020. <https://www.cdc.gov/coronavirus/2019-ncov/hcp/respirators-strategy/crisis-alternate-strategies.html>. Accessed 31 Mar 2020.
5. Welch D, Buonanno M, Grilj V, Shuryak I, Crickmore C, Bigelow AW, et al. Far-UVC light: A new tool to control the spread of airborne-mediated microbial diseases. *Scientific Reports*. 2018;8:1–7. doi:10.1038/s41598-018-21058-w.
6. Bass M, DeCusatis C, Enoch J, Lakshminarayanan V, Li G, MacDonald C, et al. *Handbook of Optics, Third Edition Volume IV: Optical Properties of Materials, Nonlinear Optics, Quantum Optics*. 3 edition. New York: McGraw-Hill Education; 2009.
7. Duan S-M, Zhao X-S, Wen R-F, Huang J-J, Pi G-H, Zhang S-X, et al. Stability of SARS Coronavirus in Human Specimens and Environment and Its Sensitivity to Heating and UV Irradiation. *Biomedical and environmental sciences : BES*. 2003;16:246–55.
8. Mills D, Harnish DA, Lawrence C, Sandoval-Powers M, Heimbuch BK. Ultraviolet germicidal irradiation of influenza-contaminated N95 filtering facepiece respirators. *American Journal of Infection Control*. 2018;46:e49–55.
9. Lore MB, Heimbuch BK, Brown TL, Wander JD, Hinrichs SH. Effectiveness of three decontamination treatments against influenza virus applied to filtering facepiece respirators. *The Annals of Occupational Hygiene*. 2012;56:92–101.
